# Supplementary material for: Intrinsic capacity and quality of life trajectories in older Europeans by sex and region
Source: Research Square preprint supplement (doi:10.21203/rs.3.rs-9407485/v1), 2026-05-04
Supplement: Supplementary file 1 [file 111e539194b2a8eb22b27f09.docx]

**Table 3. Analysis of intrinsic capacity by sex. Independent samples t-Test**

| Domain | t | df | p | Cohen's d | SE Cohen’s d |
| --- | --- | --- | --- | --- | --- |
| Sensory | 2.437 | 11835 | 0.015ᵃ | 0.045 | 0.018 |
| Mental Health | -13.854 | 11449 | < .001ᵃ | -0.260 | 0.019 |
| Cognition | 5.913 | 11835 | < .001ᵃ | 0.109 | 0.018 |
| Mobility | -1.383 | 11491 | 0.167 | -0.026 | 0.019 |

Descriptive statistics by group

| Domain | Group | N | Mean | SD | CV |
| --- | --- | --- | --- | --- | --- |
| Sensory | Men | 5399 | 0.740 | 0.964 | 1.303 |
| Sensory | Women | 6438 | 0.697 | 0.930 | 1.333 |
| Mental Health | Men | 5213 | 0.884 | 1.012 | 1.144 |
| Mental Health | Women | 6238 | 1.163 | 1.121 | 0.964 |
| Cognition | Men | 5399 | 0.609 | 0.852 | 1.398 |
| Cognition | Women | 6438 | 0.518 | 0.828 | 1.598 |
| Mobility | Men | 5257 | 0.350 | 0.671 | 1.915 |
| Mobility | Women | 6236 | 0.368 | 0.678 | 1.843 |

Note: Results from Student's t-test comparing intrinsic capacity domains between men and women. Significant differences were found in mental health, cognition (p < .001), and sensory domain (p = 0.015). Brown-Forsythe test indicates violation of homogeneity of variances in variables marked with ᵃ.
SD: Standard Deviation; SE: Standard Error; CV: Coefficient of Variation.

**Table 4. ANOVA of total intrinsic capacity by sex and region**

| Source | Sum of Squares | df | Mean Square | F | p | η² |
| --- | --- | --- | --- | --- | --- | --- |
| Sex | 40.261 | 1 | 40.261 | 9.575 | 0.002 | 8.164×10⁻⁴ |
| Region | 943.753 | 3 | 314.584 | 74.813 | < .001 | 0.019 |
| Sex ✻ Region | 35.640 | 3 | 11.880 | 2.825 | 0.037 | 7.227×10⁻⁴ |
| Residuals | 48293.823 | 11485 | 4.205 |  |  |  |

Descriptive statistics – Total Intrinsic Capacity

| Region | Sex | N | Mean | SD | SE | CV |
| --- | --- | --- | --- | --- | --- | --- |
| South | Men (0) | 1271 | 2.760 | 2.080 | 0.058 | 0.754 |
| South | Women (1) | 1499 | 3.077 | 2.372 | 0.061 | 0.771 |
| East | Men (0) | 653 | 2.989 | 2.209 | 0.086 | 0.739 |
| East | Women (1) | 880 | 2.955 | 2.193 | 0.074 | 0.742 |
| Continental | Men (0) | 2060 | 2.601 | 2.013 | 0.044 | 0.774 |
| Continental | Women (1) | 2383 | 2.752 | 1.970 | 0.040 | 0.716 |
| North | Men (0) | 1273 | 2.148 | 1.798 | 0.050 | 0.837 |
| North | Women (1) | 1474 | 2.225 | 1.889 | 0.049 | 0.849 |

Note: Results from fixed-effects ANOVA (Type III Sum of Squares) for total intrinsic capacity. Significant differences were observed by sex (p = 0.002) and region (p < .001), as well as a sex ✻ region interaction (p = 0.037). Effect size (η²) indicates a small influence of these variables. Men (0) and Women (1).
SD: Standard Deviation; SE: Standard Error; CV: Coefficient of Variation.

**Table 5. Economic difficulty and intrinsic capacity**

| Cases | Sum of Squares | df | Mean Square | F | p | η² |
| --- | --- | --- | --- | --- | --- | --- |
| Economic Difficulty | 1,798,701 | 3 | 599,567 | 146.513 | < .001 | 0.037 |
| Residuals | 47,363,578 | 11,574 | 4,092 |  |  |  |

Note: Type III Sum of Squares.

Descriptive Statistics – TOTAL Intrinsic Capacity

| Economic Difficulty | N | Mean | SD | SE | Coefficient of Variation |
| --- | --- | --- | --- | --- | --- |
| 1. Severe difficulty | 759 | 3.622 | 2.322 | 0.084 | 0.641 |
| 2. Some difficulty | 2,239 | 3.070 | 2.211 | 0.047 | 0.720 |
| 3. Slight difficulty | 3,204 | 2.596 | 2.044 | 0.036 | 0.787 |
| 4. No difficulty | 5,376 | 2.291 | 1.877 | 0.026 | 0.820 |

Note: Descriptive statistics of total intrinsic capacity according to financial difficulty. N = sample size; SD = standard deviation; SE = standard error. The coefficient of variation indicates the relative variability within each category.

**Table 6. Living with a spouse/partner, sex, and intrinsic capacity**

| Cases | Sum of Squares | df | Mean Square | F | p | η² |
| --- | --- | --- | --- | --- | --- | --- |
| Living with a spouse/partner | 608,903 | 1 | 608,903 | 144.323 | < .001 | 0.012 |
| Sex | 68,307 | 1 | 68,307 | 16.190 | < .001 | 0.001 |
| Living with a spouse/partner ✻ Sex | 59,479 | 1 | 59,479 | 14.098 | < .001 | 0.001 |
| Residuals | 49,923,645 | 11,833 | 4,219 |  |  |  |

Note: Type III Sum of Squares.

**Descriptive Statistics – TOTAL Intrinsic Capacity**

| Sex | Living with a Spouse/Partner | N | Mean | SD | SE | Coefficient of Variation |
| --- | --- | --- | --- | --- | --- | --- |
| Male | Yes | 4,550 | 2.482 | 2.008 | 0.030 | 0.809 |
| Male | No | 849 | 2.879 | 2.068 | 0.071 | 0.718 |
| Female | Yes | 4,706 | 2.495 | 2.017 | 0.029 | 0.808 |
| Female | No | 1,732 | 3.252 | 2.257 | 0.054 | 0.694 |

Note: Descriptive statistics of total intrinsic capacity by sex and cohabitation with a spouse/partner. N = sample size; SD = standard deviation; SE = standard error. The coefficient of variation indicates the relative variability within each category. 1 = Yes (Lives with spouse/partner), 3 = No (Does not live with spouse/partner).
